# Supplementary material
Source: publisher figshare collection journal article supplement (https://tandf.figshare.com/ndownloader/files/21034473)
Supplement: Supplementary file 1 [file 21034473]

## Supplemental material

Figure S1. Percentage of patients treated with medical and surgical therapy during the study period.

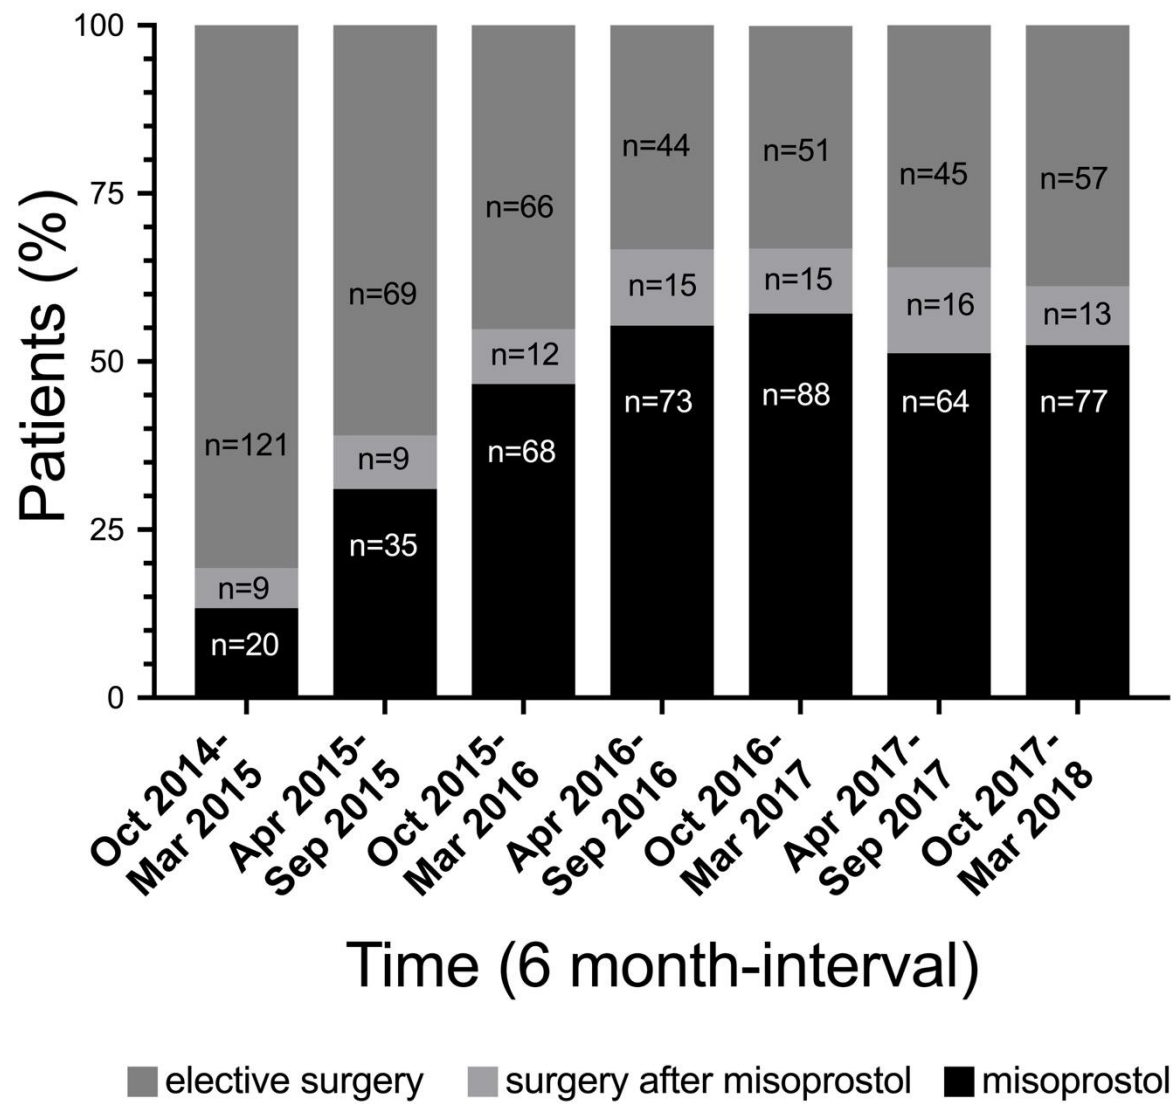

Figure S2. Indications for surgery as first-line treatment option.

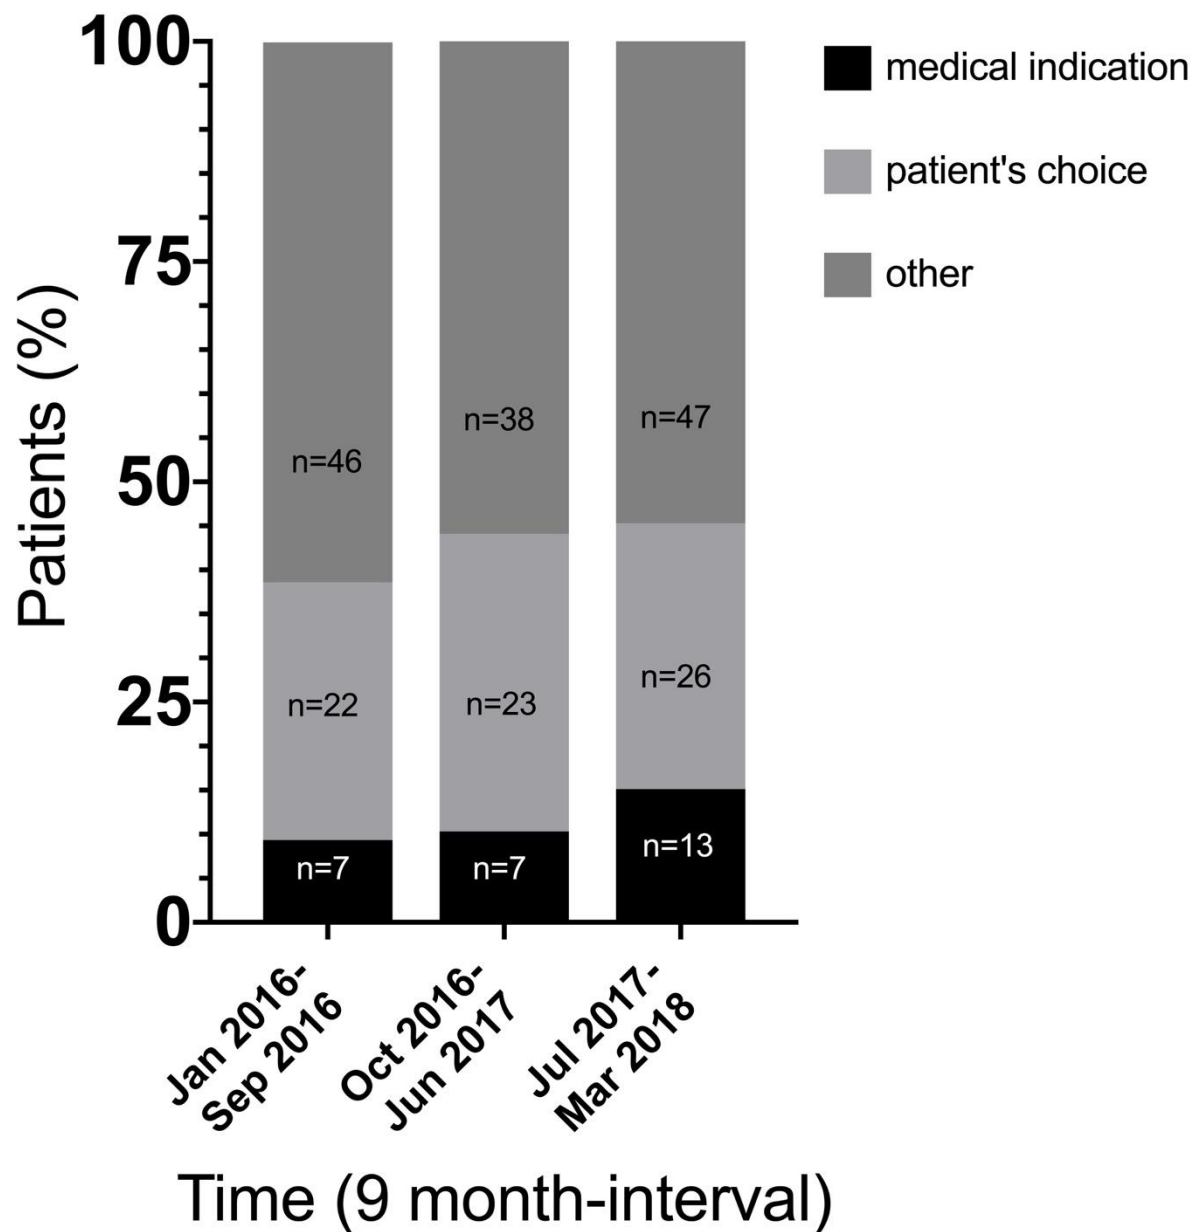

Data available from January 2016 to March 2018.

Comorbidities are defined as pre-existing conditions which contraindicate medical therapy: hemoglobin level < 10 g/dL, personal history of clotting disorders, inflammatory bowel diseases, severe asthma, glaucoma, severe kidney and liver diseases.

Other includes: sepsis and/or pelvic inflammatory disease, active bleeding and/or hemodynamic instability, gestational age > 12<sup>0/7</sup> weeks of amenorrhea, gestational sac (GS)

mean diameter  $\geq 40$  mm and/or crown–rump length (CRL)  $\geq 30$  mm, suspected molar pregnancy, recurrent miscarriages.

Table S1. Demographic and ultrasonographic characteristics of patients receiving misoprostol treatment.

|                                    |                |
|------------------------------------|----------------|
| Age (years)                        | 34.9 $\pm$ 5.4 |
| Gestational age (weeks)            | 9.2 $\pm$ 1.4  |
| Nulliparous                        | 302 (58.8)     |
| Uterine scar*                      | 65 (12.6)      |
| Embryonic or fetal death           | 362 (70.4)     |
| Anembryonic gestation              | 149 (29.0)     |
| Incomplete spontaneous miscarriage | 3 (0.6)        |
| GS mean diameter (mm)§             | 23.9 $\pm$ 6.4 |
| CRL (mm) §                         | 8.9 $\pm$ 6.5  |
| GS mean diameter (mm)#             | 18.6 $\pm$ 8.5 |
| Endometrial thickness (mm) \$      | 41.7 $\pm$ 7.6 |

Data are presented as mean  $\pm$  SD or N (%) of group population (n=514) for continuous and categorical variables, respectively.

GS: Gestational Sac; CRL: Crown-Rump Length;

\* hysterotomy due to previous cesarean section or myomectomy. § For cases with embryonic or fetal death. # For cases with anembryonic gestation. \$ For cases with incomplete miscarriage.

Table S2. Demographic characteristics and sonographic features according to misoprostol treatment outcome.

|                         | Success (n = 425) | Failure (n = 69) * | <i>p</i> value |
|-------------------------|-------------------|--------------------|----------------|
| GA at diagnosis (weeks) | 9.1 ± 1.4         | 9.3 ± 1.2          | 0.187          |
| Maternal age (years)    | 35.0 ± 5.4        | 34.4 ± 6.2         | 0.182          |
| Nulliparity             | 247 (58.1)        | 43 (62.3)          | 0.511          |
| Uterine scar            | 49 (11.5)         | 11 (15.9)          | 0.876          |
| Leiomyomas              | 11 (2.6)          | 1 (1.4)            | 0.234          |
| Gestational sac (mm)    | 21.1 ± 7.6        | 26.1 ± 9.2         | < 0.0001       |
| CRL (mm)                | 8.8 ± 6.6         | 9.2 ± 6.5          | 0.265          |

Data are presented as mean ± SD or N (%) for continuous and categorical variables, respectively.

\* Twenty patients refusing the 2<sup>nd</sup> dose of misoprostol excluded from the analyses.

GA: Gestational Age; Uterine scar: hysterotomy due to previous cesarean section or myomectomy; CRL: Crown-Rump Length.

Table S3. Complications and side effects of misoprostol therapy

| Complications                                      | N (%)      |
|----------------------------------------------------|------------|
| Hemorrhage                                         | 24 (4.7)   |
| Antibiotic therapy                                 | 8 (1.6)    |
| Beta-hCG persistence/ US suspicion of retained POC | 8 (1.6)    |
| Suspected pelvic infection                         | 1 (0.2)    |
| No complications                                   | 473 (92.0) |
| Side effects                                       | N (%)      |
| Nausea / Vomiting / Diarrhea                       | 4 (0.8)    |
| Hypotension                                        | 12 (2.3)   |
| Hyperpyrexia                                       | 16 (3.1)   |
| No side effects                                    | 482 (93.8) |

Data are presented as N (%) of group population (n=514). Beta-hCG: Beta-human Chorionic Gonadotropin; US: ultrasound; POC: product of conception. Hyperpyrexia was defined as auricular body temperature > 38°C.
